# Supplementary material for: Understanding reactivity, aromaticity and absorption spectra of carbon cluster mimic to graphene: a DFT study
Source: Royal Society of Chemistry journal article supplement (doi:10.1039/c6ra15016k), 2016-01-01
Supplement: c6ra15016k1.pdf [file c6ra15016k1.pdf]

### Electronic supplementary information

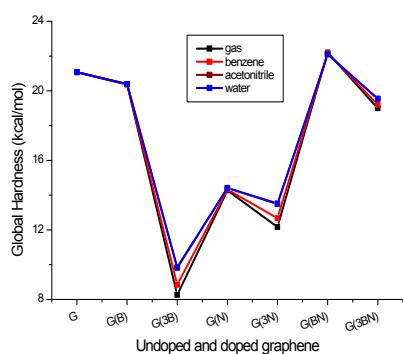

(a)

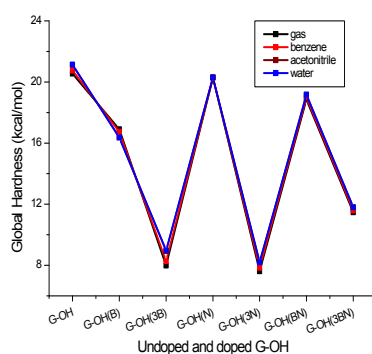

(b)

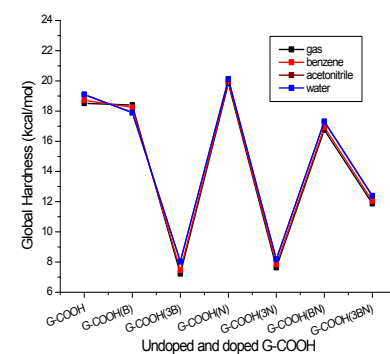

(c)

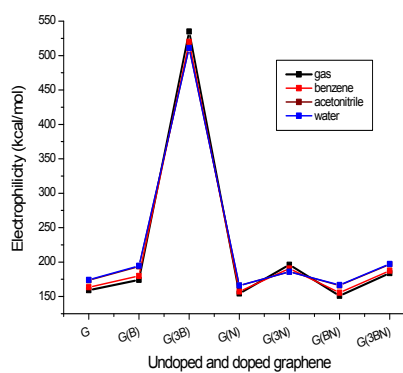

(d)

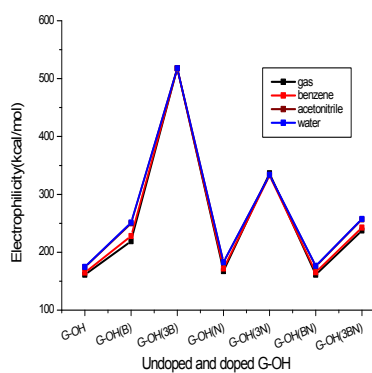

(e)

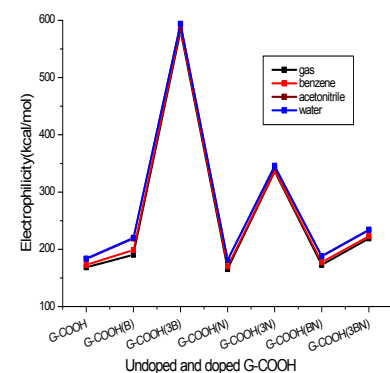

(f)

Supplementary Fig. S1 Variation in global hardness (a-c) and electrophilicity (d-f) of undoped and doped graphene, G-OH and G-COOH in gas and solvent phase at B3LYP/6-31G(d) level of theory

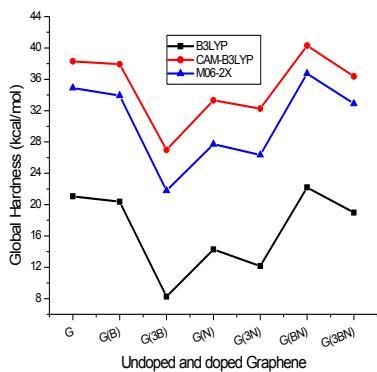

(a)

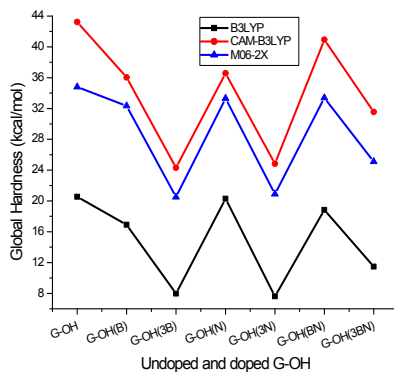

(b)

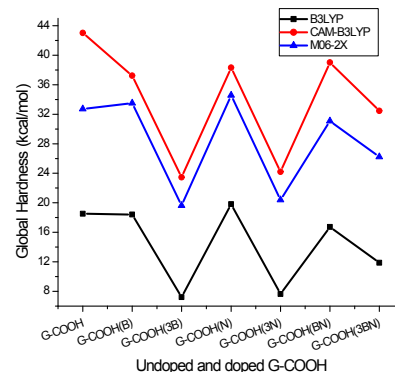

(c)

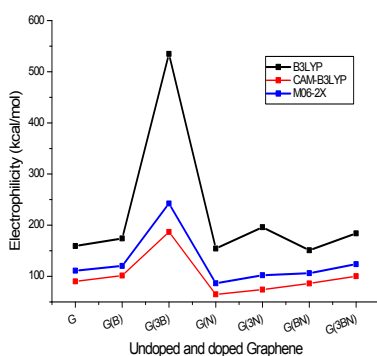

(d)

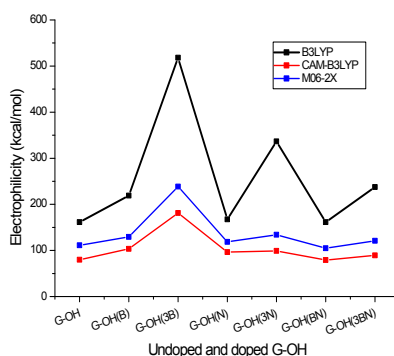

(e)

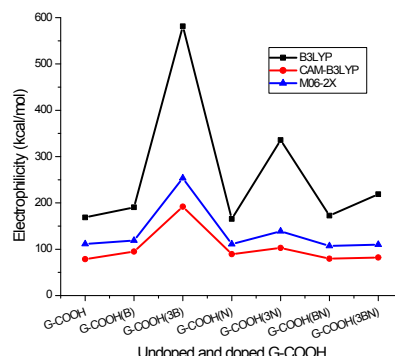

(f)

Supplementary Fig. S2 Variation in global hardness (a-c) and electrophilicity (d-f) of undoped and doped graphene, G-OH and G-COOH in gas phase using B3LYP, CAMB3LYP and M062X functional with 6-31G(d) basis set

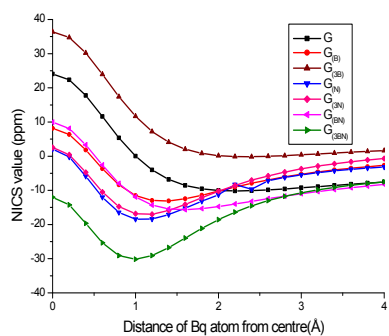

(a)

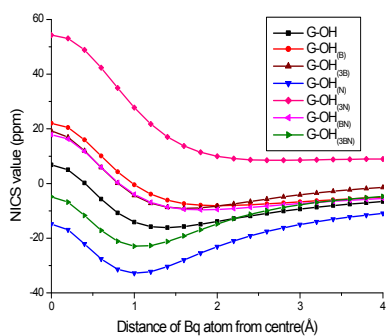

(b)

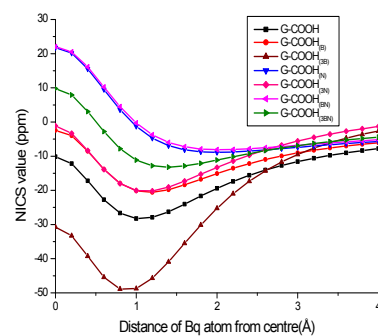

(c)

Supplementary Fig. S3 Variation in aromaticity ( $NICS_{zz}$ ) at the edge of the undoped and doped (a) graphene (b) G–OH and (c) G–COOH at B3LYP/6-31G(d) level of theory.

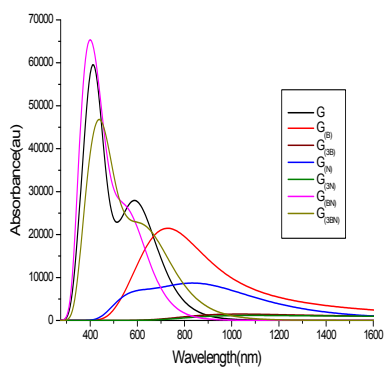

(a)

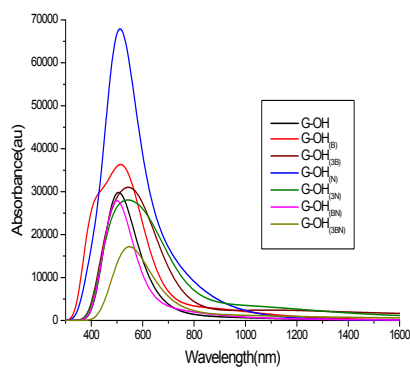

(b)

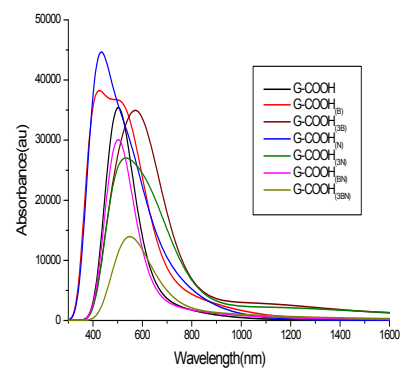

(c)

Supplementary Fig. S4 UV-Visible absorption spectra of undoped and doped (a) graphene, (b) G–OH and (c) G–COOH in gas phase at CAM-B3LYP/6-31G(d) level of theory

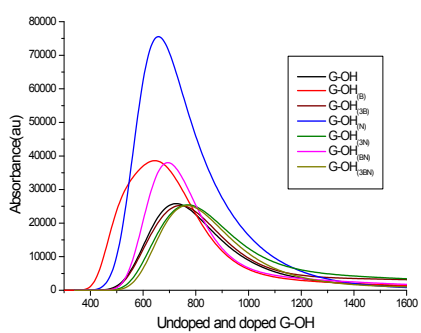

(a)

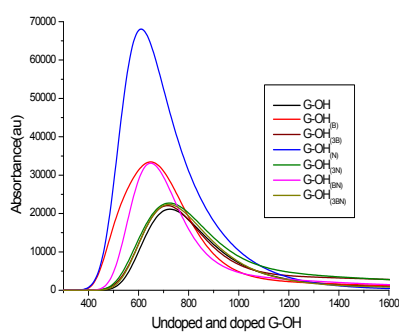

(b)

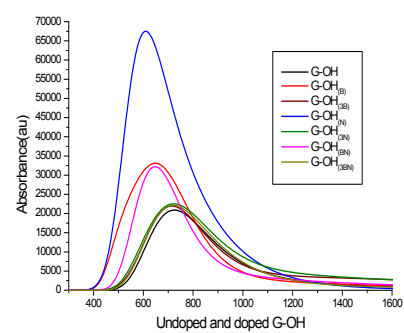

(a)

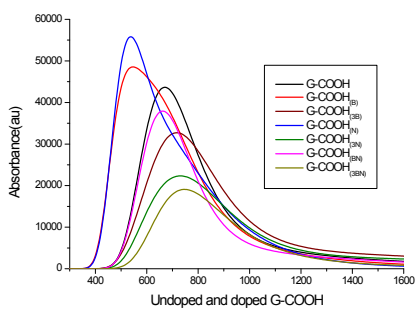

(d)

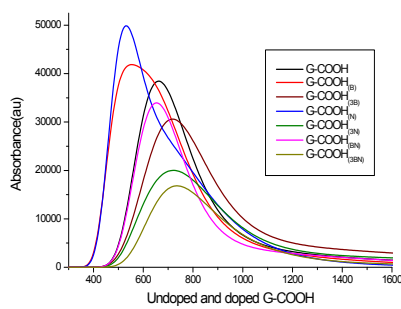

(e)

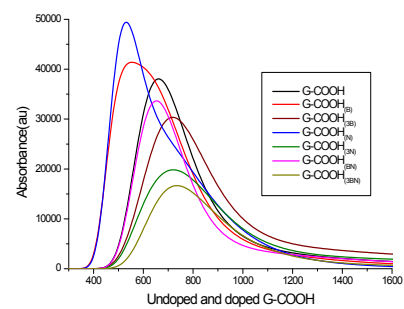

(f)

Supplementary Fig. S5 UV-Visible absorption spectra of undoped and doped G-OH in (a) benzene ( $\epsilon=2.27$ ) (b) acetonitrile ( $\epsilon=35.69$ ) (c) water ( $\epsilon=78.35$ ) and G-COOH in (d) benzene ( $\epsilon=2.27$ ) (e) acetonitrile ( $\epsilon=35.69$ ) (f) water ( $\epsilon=78.35$ ) at B3LYP/6-31G(d) level of theory
